# Supplementary material
Source: publisher figshare collection journal article supplement (https://springernature.figshare.com/ndownloader/files/23202776)
Supplement: Supplementary file [file 23202776]

## **Veterinary nursing competence survey**

1. In what year were you born? (enter 4-digit birth year; for example 1992)

2. What is your gender?

☐ Female

☐ Male

3. \*What is your veterinary nursing qualification?

☐ UCD diploma (level 7)

☐ UCD degree (level 8)

☐ DkIT degree (level 7)

☐ LyIT degree (level 7)

☐ AIT degree (level 7)

☐ St John's Diploma (level 6)

☐ Other (please specify)

4. \*In what year did you qualify as a veterinary nurse? (enter 4-digit year; for example 2012)

5. \*Please indicate the type of work you are currently involved in.

☐ Companion animal practice

☐ Mixed practice

☐ Equine practice

☐ Farm animal practice

☐ Exotics

☐ Other (please specify)

6. What does the word "competent" mean to you?

7. When do you think a veterinary nurse becomes competent?

☐ During college

☐ 4-5 years after graduation

☐ By graduation

☐ > 5 years after graduation

☐ In the 1st year after graduation

☐ >10 years after graduation

☐ 2-3 years after graduation      ☐ I don't know

Comment (optional)

8. When do you think a veterinary nurse becomes experienced?

- ☐ During college      ☐ 4-5 years after graduation  
☐ By graduation      ☐ more than 5 years after graduation  
☐ In the 1st year after graduation      ☐ more than 10 years after graduation  
☐ 2-3 years after graduation      ☐ I don't know

Comment (optional)

\* RVN survey only
